# Supplementary material
Source: PubMed Central journal article supplement (PMC8896889)
Supplement: mmc2.pdf [file mmc2.pdf]

## Table S2: Definition of lymphoid clusters for CITE-seq data, Related to STAR Methods, Figure 1 and Data S4

Related to **Figure 1B, C** and the **STAR Methods: CITE-seq: multi-modal cluster annotation**. The phenotypes of the identified sub-populations are shown in **Data S4: Multi-modal annotation of CITE-seq data**. Supporting GEX and ADT clustering analyses are shown in **Supplementary Figure 1E** and **Data S3: Analysis of Mass and Flow Cytometry, Repertoire and Proteomics, Related to STAR Methods**.

### Table of Contents

|                                                        |   |
|--------------------------------------------------------|---|
| T and NK cell sub-population phenotypes.....           | 1 |
| B cell and plasmablast sub-population phenotypes ..... | 3 |

### T and NK cell sub-population phenotypes

| Population | Subset           | ADT phenotype                            | TCR phenotype                                            | BCR phenotype          | GEX phenotype      | Cell count  |
|------------|------------------|------------------------------------------|----------------------------------------------------------|------------------------|--------------------|-------------|
| CD4        |                  | singlet, CD3+<br>CD4+                    | singlet                                                  | <1% IgG, <20 HC<br>umi | CD4+               | n = 270,003 |
| CD8        |                  | singlet, CD3+<br>CD8+                    | singlet                                                  | <1% IgG, <20 HC<br>umi | CD8A+              | n = 106,245 |
| DP         |                  | singlet, CD3+<br>CD4+ CD8+               | singlet                                                  | <1% IgG, <20 HC<br>umi |                    | n = 7,102   |
| DN         |                  | singlet, CD3+<br>CD4- CD8-               | singlet                                                  | <1% IgG, <20 HC<br>umi |                    | n = 4,644   |
| MAIT       | CD8+             | singlet, CD3+<br>CD8+ Va7.2+<br>CD161+   | singlet, TRAV1-2,<br>TRAJ33 , TRAJ12<br>, TRAJ20         | <1% IgG, <20 HC<br>umi | Various            | } n = 3,935 |
|            |                  | singlet, CD3+<br>CD8+ Va7.2+<br>CD161+   | singlet, TCR<br>chains include<br>Mait sequences         | <1% IgG, <20 HC<br>umi | MAIT               |             |
|            | DN               | singlet, CD3+<br>Va7.2+<br>CD161+        | singlet, TRAV1-2,<br>TRAJ33 , TRAJ12<br>, TRAJ20         | <1% IgG, <20 HC<br>umi | Various-           | } n = 639   |
|            |                  | singlet, CD3+<br>Va7.2+<br>CD161+        | singlet, TCR<br>chains include<br>Mait sequences         | <1% IgG, <20 HC<br>umi | MAIT               |             |
| γδ T       | Vδ2+ve           | singlet, CD3 <sup>+ve</sup><br>Vδ2+ Vγ9+ | singlet                                                  | <1% IgG, <20 HC<br>umi | TRDV2+             | n = 6,239   |
|            | Vδ2-ve<br>Vγ9-ve | singlet, CD3+<br>TCRγδ+                  | singlet                                                  | <1% IgG, <20 HC<br>umi | TRDV1+<br>(TRDV3+) | n = 2,238   |
|            | Vδ2-ve<br>Vγ9+ve | singlet, CD3+<br>Vδ2- Vγ9+               | singlet                                                  | <1% IgG, <20 HC<br>umi | TRDV1+<br>(TRDV3+) | n = 1,227   |
| iNKT       | true             | singlet,<br>Va24Ja18+                    | singlet, TRAV10,<br>TRAJ18                               | <1% IgG, <20 HC<br>umi |                    | n = 293     |
|            | ADT              | singlet,<br>Va24Ja18+                    | singlet, TRAV10,<br>TRAJ18 +<br>additional V/J<br>chains | <1% IgG, <20 HC<br>umi |                    | n = 93      |

---

|           |                           |                          |                        |               |            |
|-----------|---------------------------|--------------------------|------------------------|---------------|------------|
| <b>NK</b> | singlet,<br><b>NCAM1+</b> | <50 TCRA &<br>TCRB reads | <1% IgG, <20 HC<br>umi | <b>NCAM1+</b> | n = 69,997 |
|-----------|---------------------------|--------------------------|------------------------|---------------|------------|

---

Definition of T and NK cell identities. **red**: identifying features, **green**: additional criteria, **blue**: confirmatory observations.

## B cell and plasmablast sub-population phenotypes

| Population           | Subset                     | ADT phenotype                        | TCR phenotype         | BCR phenotype                                         | GEX phenotype                                         | Cell count |
|----------------------|----------------------------|--------------------------------------|-----------------------|-------------------------------------------------------|-------------------------------------------------------|------------|
| <b>B</b>             |                            | singlet, CD19+                       | <50 TCRA & TCRB reads | singlet                                               | CD19+                                                 | n = 43,043 |
|                      | B.NAIVE.1                  | IgD+ IgM+ CD27-                      |                       | IGHD, IGHM (<2 mutations)                             | IGHD+ IGHM+ TCL1A+                                    | n = 16,032 |
|                      | B.NAIVE.2                  | IgD+ IgM+ CD27-                      |                       |                                                       | IGHD+ IGHM+ TCL1A+                                    | n = 2,547  |
|                      | B.NAIVE.3                  | IgDint IgM+ CD27-                    |                       | IGHD, IGHM (<2 mutations)                             | IGHD+ IGHM+ TCL1A+                                    | n = 531    |
|                      | B.NAIVE.IgDlo              | IgDlow IgMlow CD27-                  |                       | IGHD, IGHM (<2 mutations)                             | IGHD+ IGHM+ TCL1A+                                    | n = 71     |
|                      | B.NAIVE.IFN.resp           | IgD+ IgM+ CD27-                      |                       | IGHD, IGHM (<2 mutations)                             | IGHD+ IGHM+ TCL1A+; IFN resp gene +ve (e.g. MX1+)     | n = 1,176  |
|                      | B.NAIVE.CD1c               | IgD+ IgM+ CD27- CD1c+                |                       | IGHD, IGHM (<2 mutations), or none                    | IGHD+ IGHM+ TCL1A+                                    | n = 922    |
|                      | B.int.1.IFN.resp           | IgD+ IgM+ CD27int                    |                       |                                                       | IFN resp gene +ve (e.g. MX1+)                         | n = 199    |
|                      | B.int.1.early.act          | IgD+ IgM+ CD27int                    |                       | IGHD, IGHM ( $\geq 2$ mutations)                      | IGHD+ IGHM+ TCL1Aint                                  | n = 388    |
|                      | B.int.1.early.act/sw.1     | IgDlow IgM+ CD27int                  |                       | IGHD, IGHM ( $\geq 2$ mutations), or IGHA, IGHE, IGHG | IGHDlow IGHM+ TCL1Aint                                | n = 433    |
|                      | B.int.1.early.act/sw.2     | IgD- IgM- CD27int                    |                       | IGHD, IGHM ( $\geq 2$ mutations), or IGHA, IGHE, IGHG | IGHD- IGHMlow TCL1A-                                  | n = 168    |
|                      | B.int.2.unsw               | IgD+ IgM+ CD27int                    |                       | IGHD, IGHM (<2 mutations)                             | IGHD+ IGHM+ TCL1Aint                                  | n = 835    |
|                      | B.int.2.IFN.resp           | IgDlow IgM+ CD27int                  |                       |                                                       | IGHDlow IGHM+ TCL1Aint; IFN resp gene +ve (e.g. MX1+) | n = 152    |
|                      | B.int.2.early.act.IFN.resp | IgD+ IgM+ CD27int                    |                       | IGHD, IGHM ( $\geq 2$ mutations)                      | IGHD+ IGHM+ TCL1Aint; IFN resp gene +ve (e.g. MX1+)   | n = 68     |
|                      | B.int.2.early.act/sw.1     | IgDlow IgM+ CD27int                  |                       | IGHD, IGHM ( $\geq 2$ mutations), or IGHA, IGHE, IGHG | IGHDlow IGHM+ TCL1Aint                                | n = 3,978  |
|                      | B.int.2.early.act/sw.2     | IgD+ IgM+ CD27int                    |                       | IGHD, IGHM ( $\geq 2$ mutations), or IGHA, IGHE, IGHG | IGHDlow IGHM+ TCL1Aint                                | n = 1,016  |
|                      | B.TRANSIT.CD10             | IgD+ IgM+ CD27- CD10+                |                       |                                                       | IGHD+ IGHM+ TCL1A+                                    | n = 1,116  |
|                      | B.mitohi.1                 |                                      |                       |                                                       | >4% mito                                              | n = 1,632  |
|                      | B.mitohi.2                 |                                      |                       |                                                       | >4% mito                                              | n = 470    |
|                      | B.cyc                      |                                      |                       |                                                       | MKI67+                                                | n = 744    |
|                      | B.UNSW.MEM                 | IgD+ IgM+ CD27+                      |                       | IGHD, IGHM                                            | IGHD+ IGHM+ TCL1Aint                                  | n = 2,597  |
|                      | B.SW.MEM.1                 | IgD- IgM- CD27+ IgA+ or IgG+         |                       | IGHA, IGHE, IGHG                                      | IGHD- IGHMlow TCL1A-                                  | n = 5,855  |
|                      | B.SW.MEM.2                 | IgD- IgM- CD27+ IgA+ or IgG+         |                       |                                                       | IGHD- IGHMlow TCL1A-                                  | n = 1,970  |
|                      | B.SW.MEM.IFN.resp          | IgD- IgM- CD27+ IgA+ or IgG+         |                       | IGHA, IGHE, IGHG or none                              | IGHD- IGHMlow TCL1A-; IFN resp gene +ve (e.g. MX1+)   | n = 93     |
| <b>Plasma-blasts</b> |                            | singlet, CD19low CD20- CD38hi CD39hi | <50 TCRA & TCRB reads | singlet                                               | XBP1+ SLAMF7+ PRDM1+                                  | n = 8,596  |
|                      | PB                         |                                      |                       | >100 HC UMI                                           |                                                       | n = 5,948  |
|                      | PB.IFN.resp                |                                      |                       | >100 HC UMI                                           | IFN resp gene +ve (e.g. MX1hi)                        | n = 38     |
|                      | PB.mitohi                  |                                      |                       | >100 HC UMI                                           | >4% mito                                              | n = 36     |
|                      | PB.cyc                     |                                      |                       | >100 HC UMI                                           | MKI67hi                                               | n = 2,574  |

Definition of B and plasmablast subsets. red: identifying features, green: additional criteria, blue: confirmatory observations (thresholds checked but not applied).
