# Supplementary material
Source: PubMed Central journal article supplement (PMC8896889)
Supplement: mmc8.pdf [file mmc8.pdf]

## Data S4: Multimodal Annotation of CITE-seq Data, Related to STAR Methods, Figure 1B,C and Table S2

Related to **Figure 1B,C** and the **STAR Methods: CITE-seq: multimodal cluster annotation**. Supporting GEX and ADT clustering analyses are shown in **Figure S1E** and **Data S3: Analysis of Mass and Flow Cytometry, Repertoire and Proteomics, Related to STAR Methods**. The multimodal definitions of the lymphoid cell populations are given in **Table S2: Definition of lymphoid clusters for CITE-seq data**.

### Table of Contents

|                                                                                           |           |
|-------------------------------------------------------------------------------------------|-----------|
| <b>T and NK cell populations.....</b>                                                     | <b>2</b>  |
| CD4 and CD8 T cell sub-populations.....                                                   | 2         |
| 1: Dot plot of CD4 T-cell sub-populations.....                                            | 2         |
| 2: Dot plot of CD8 T-cell sub-populations.....                                            | 3         |
| Double positive and negative T cell sub-populations.....                                  | 4         |
| 3: Dot plot of double positive (DP) T-cell populations.....                               | 4         |
| 4: Dot plot of double negative (DN) T-cell populations.....                               | 5         |
| Mucosal associated invariant T (MAIT) cell sub-populations.....                           | 6         |
| 5: Dot plot of MAIT cell sub-populations.....                                             | 6         |
| Gamma delta T cell sub-populations.....                                                   | 7         |
| 6: Dot plot of V $\delta$ 2+ve $\gamma\delta$ T-cell sub-populations.....                 | 7         |
| 7: Dot plot of V $\delta$ 2-ve V $\gamma$ 9-ve $\gamma\delta$ T-cell sub-populations..... | 8         |
| 8: Dot plot of V $\delta$ 2-ve V $\gamma$ 9+ve $\gamma\delta$ T-cell sub-populations..... | 9         |
| Invariant natural killer T (iNKT) sub-populations.....                                    | 10        |
| 9: Dot plot of iNKT cells.....                                                            | 10        |
| Natural Killer (NK) cell sub-populations.....                                             | 11        |
| 10: Dot plot of NK cell sub-populations.....                                              | 11        |
| <b>B cell and plasmablast sub-population phenotypes.....</b>                              | <b>12</b> |
| 11: Dot plot of B cell and plasmablast sub-populations.....                               | 12        |
| <b>Mononuclear phagocyte (MNP) sub-populations.....</b>                                   | <b>13</b> |
| 12: Dot plot of MNP cell sub-populations.....                                             | 13        |
| <b>Hematopoietic stem (and progenitor) cell sub-populations.....</b>                      | <b>14</b> |
| 13: Dot plot of hematopoietic stem (and progenitor) cell sub-populations.....             | 14        |
| <b>Platelet and erythrocyte sub-populations.....</b>                                      | <b>15</b> |
| 14: Dot plot of platelet and erythrocyte cell sub-populations.....                        | 15        |

# T and NK cell populations

The multimodal definition of the major T and NK cell populations is given in **Table S2: Definition of lymphoid clusters for CITE-seq data.**

## CD4 and CD8 T cell sub-populations

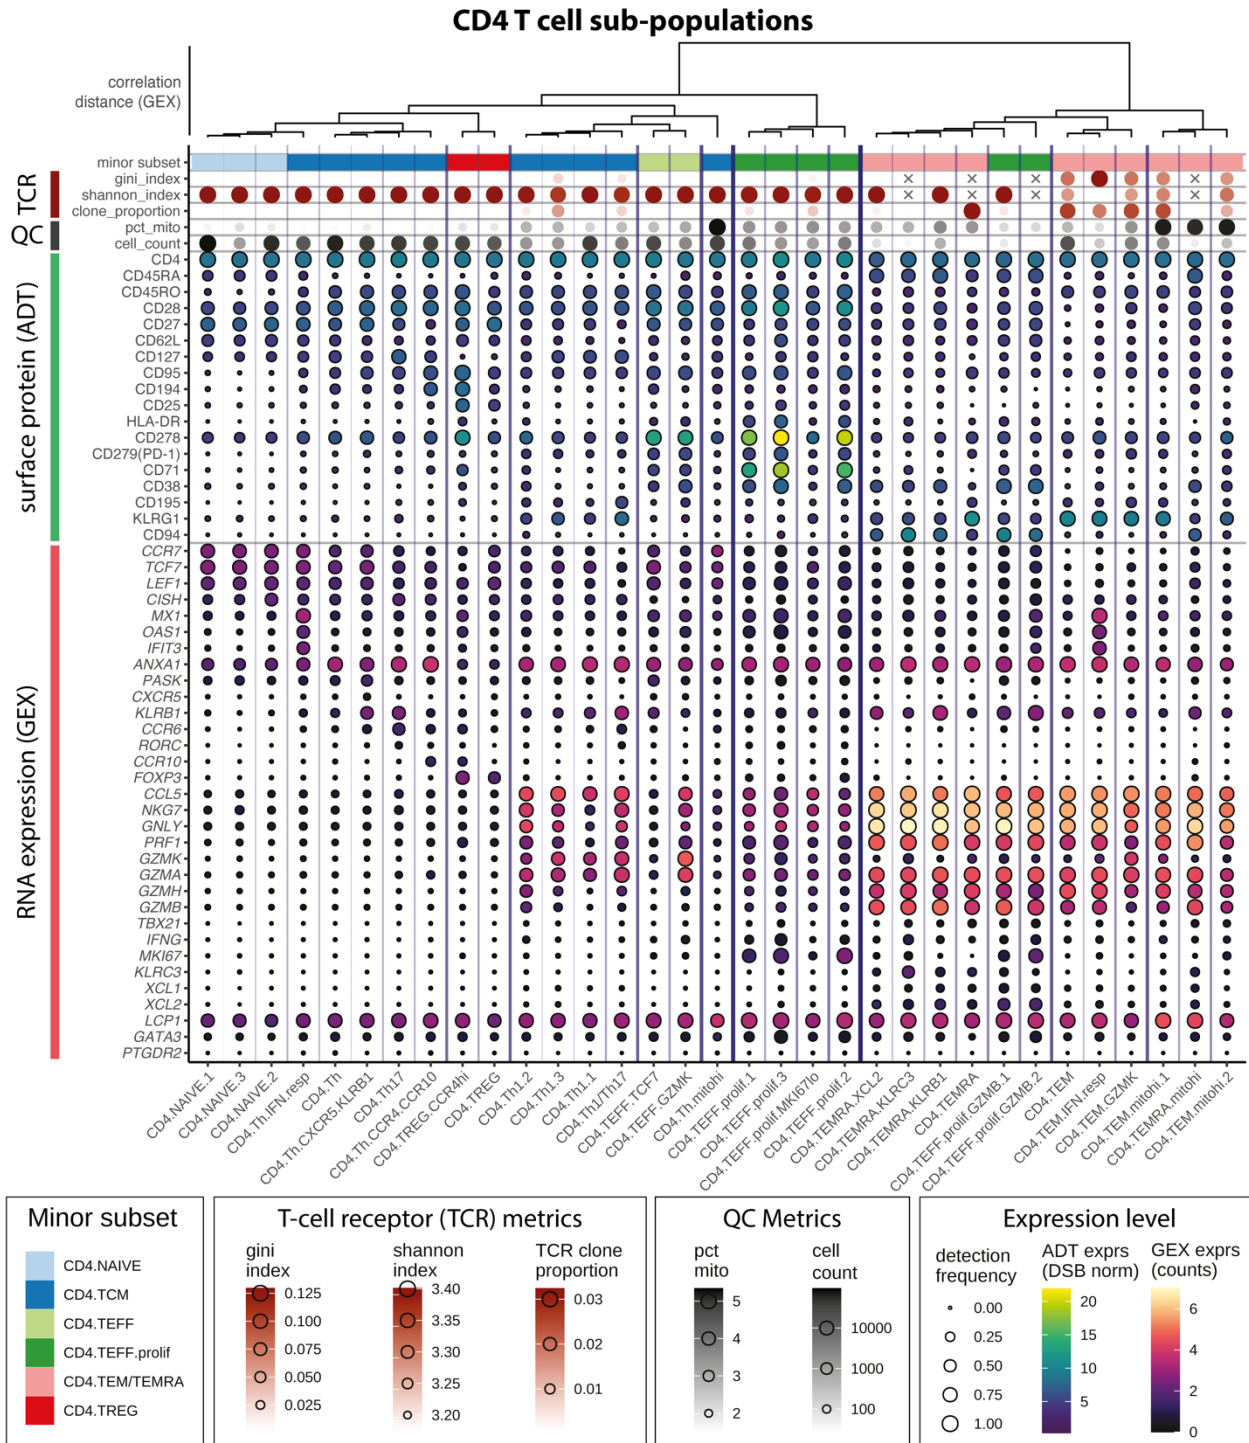

1: Dot plot of CD4 T-cell sub-populations.

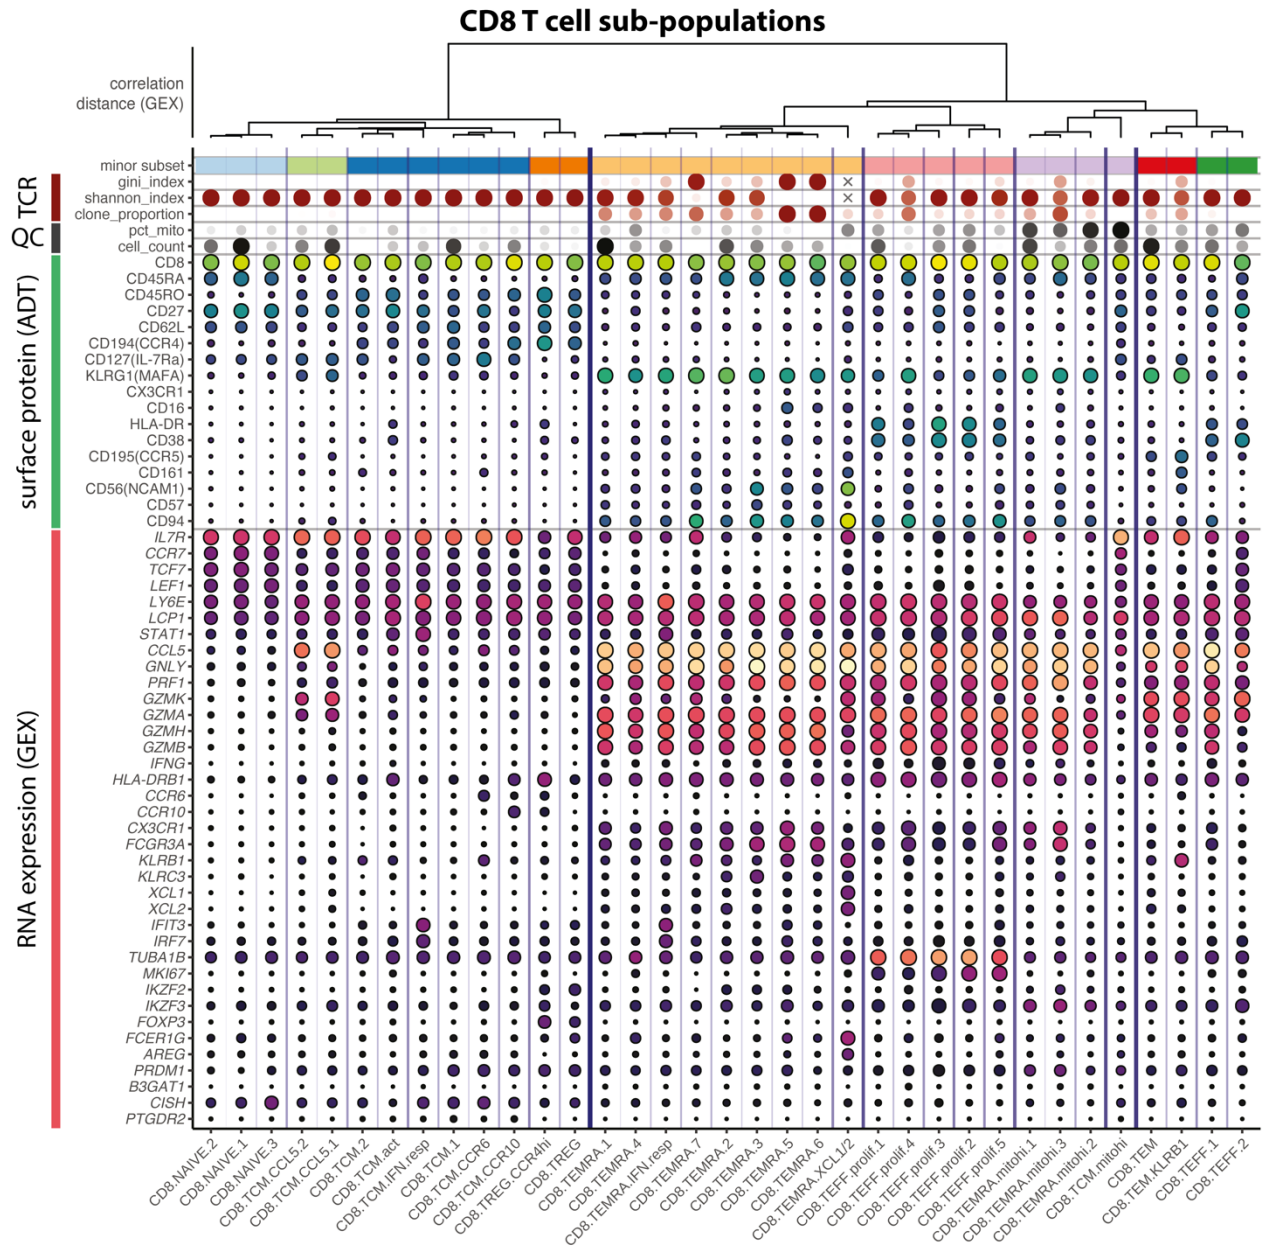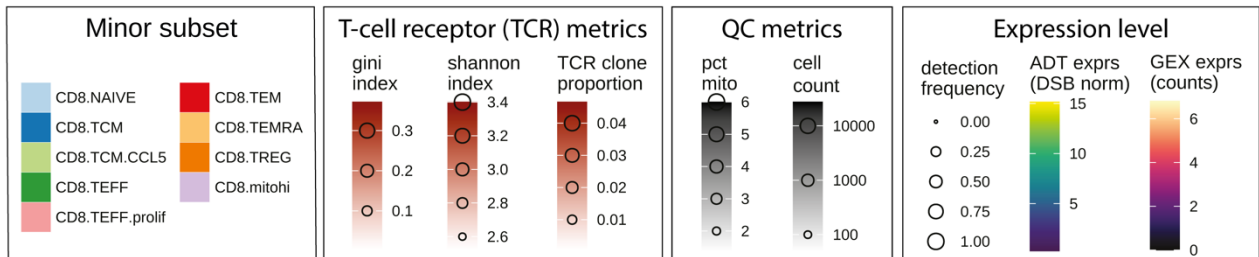

**Abbreviations** act: activated; hi: high; IFN: interferon; lo: low; mito: mitochondrial; prolif: proliferating; resp: responsive; TCM: T central memory; TEFF: T effector; TEM: T effector memory; TEMRA: CD45RA+ T effector memory; Th: T-helper; TREG: regulatory T cell. **Symbols:** x: NA.

2: Dot plot of CD8 T-cell sub-populations.

# Double positive and negative T cell sub-populations

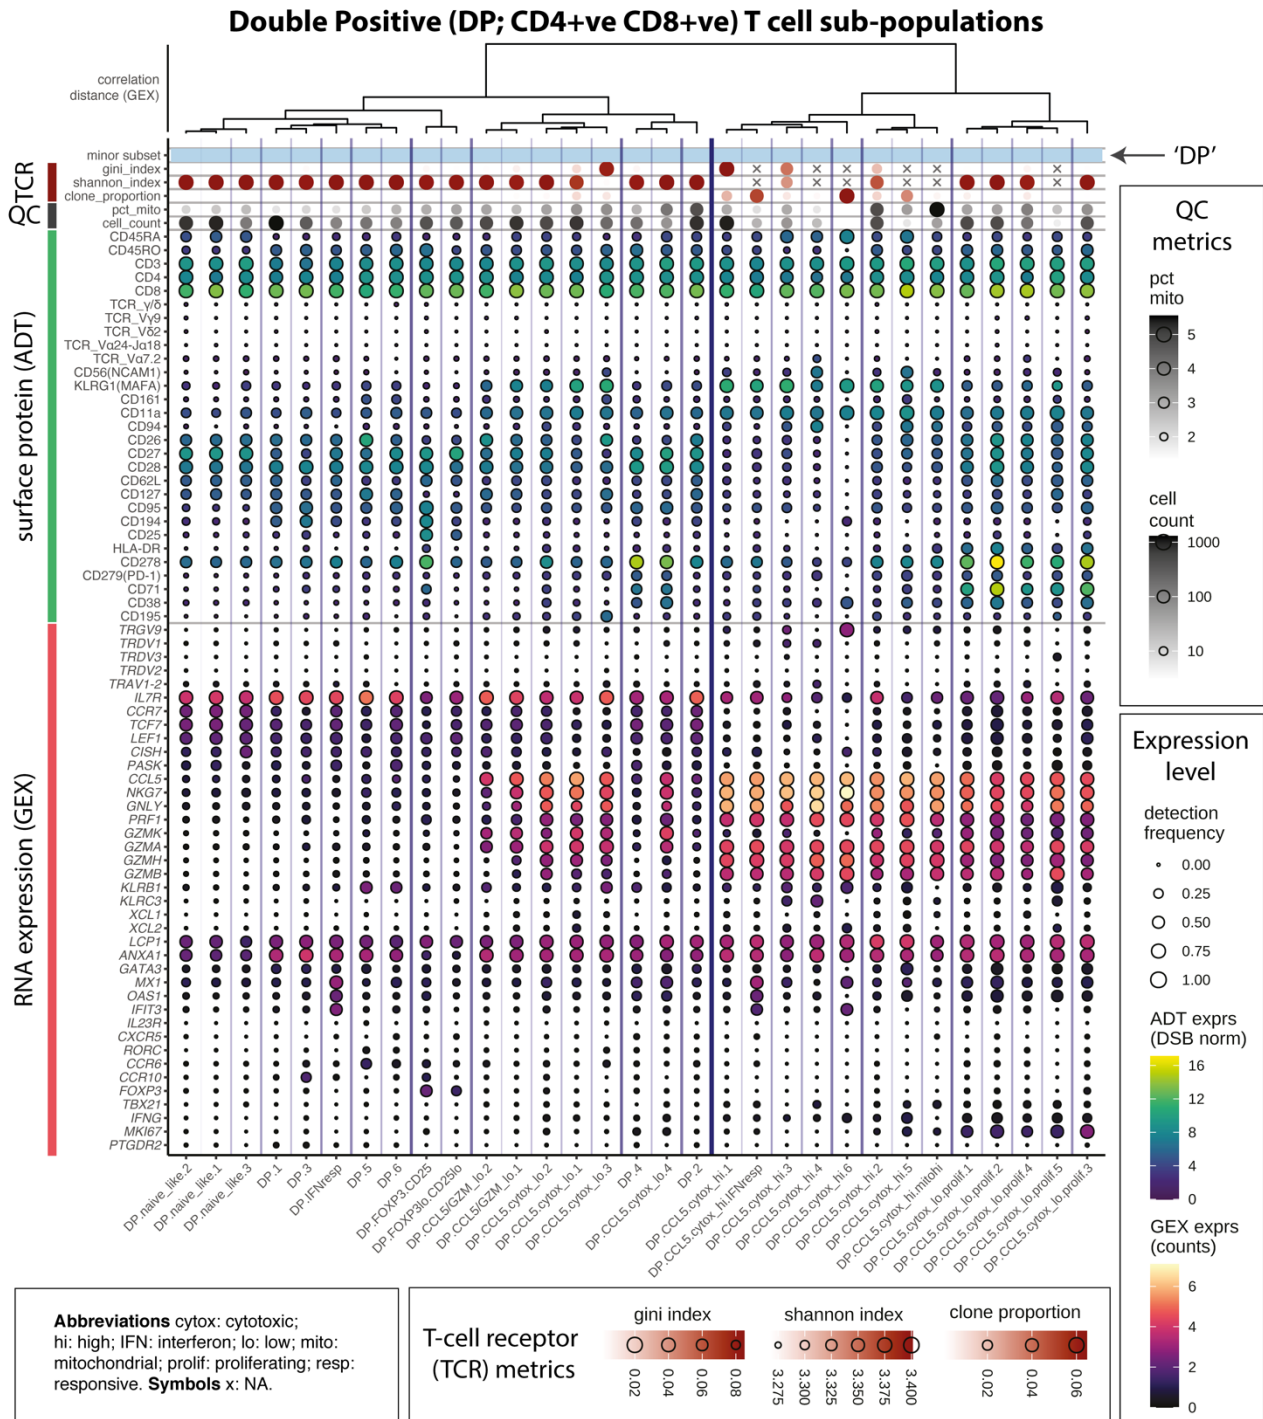

3: Dot plot of double positive (DP) T-cell populations.



## Double Negative (DN; CD4-ve CD8-ve) T cell sub-populations

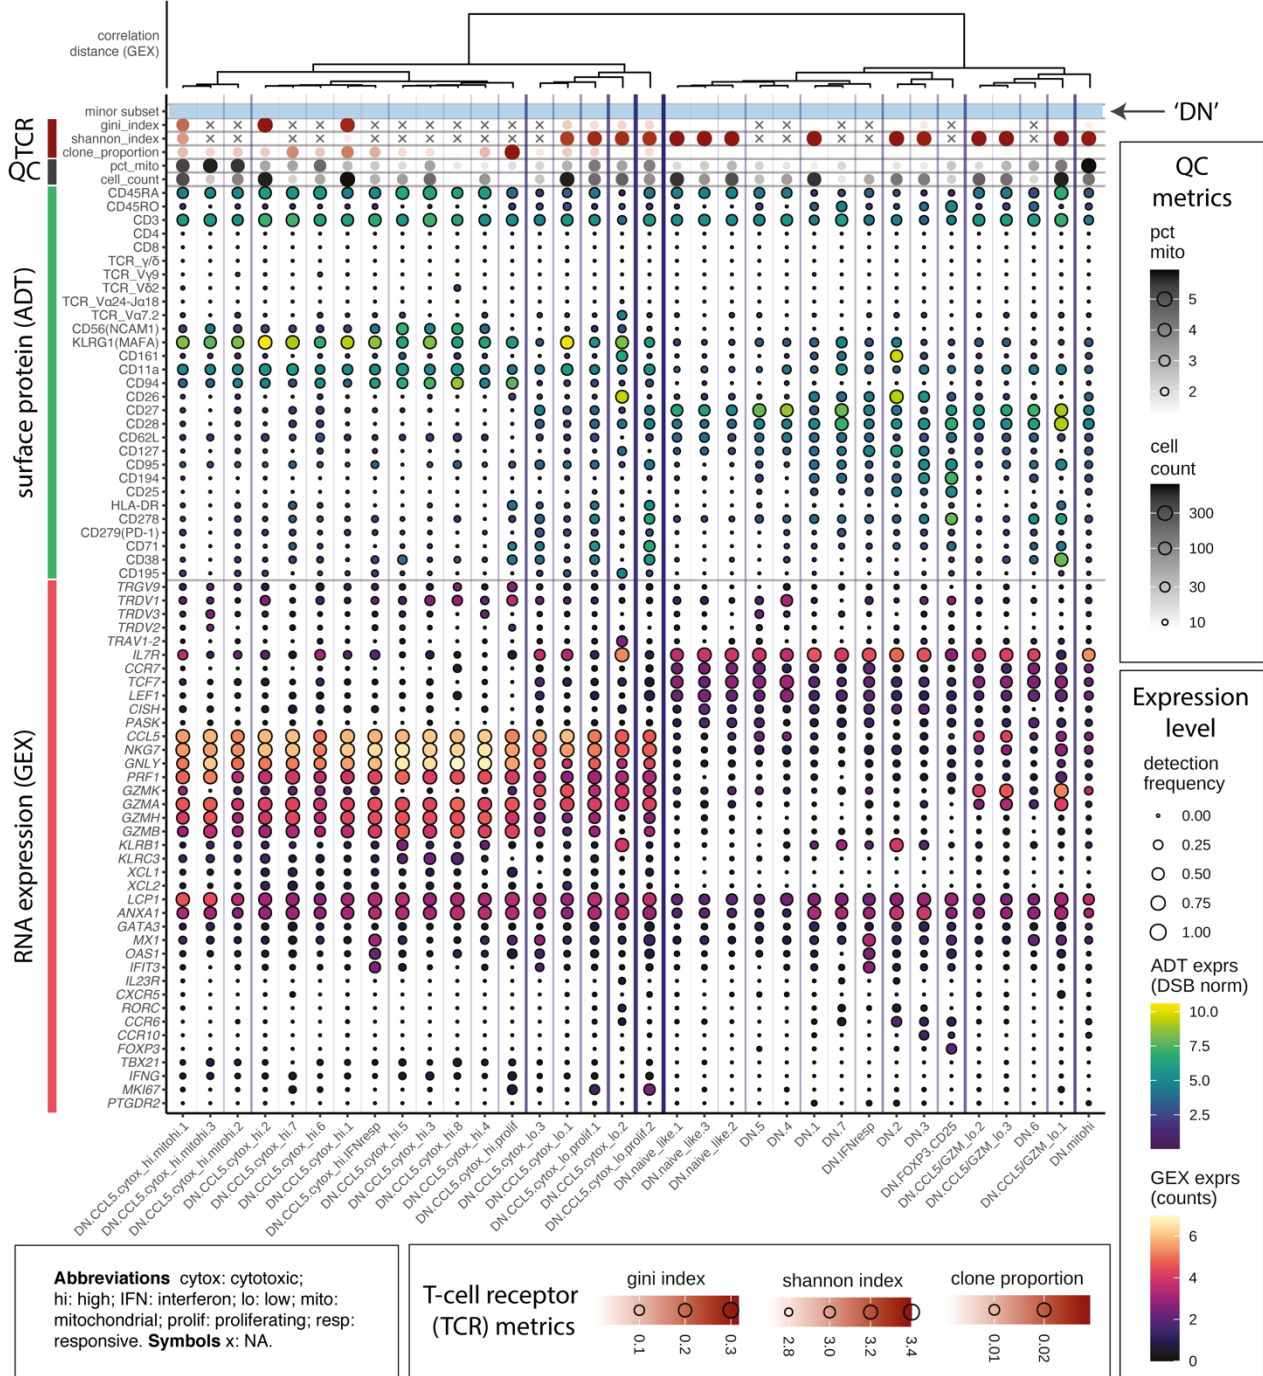

4: Dot plot of double negative (DN) T-cell populations.

# Mucosal associated invariant T (MAIT) cell sub-populations

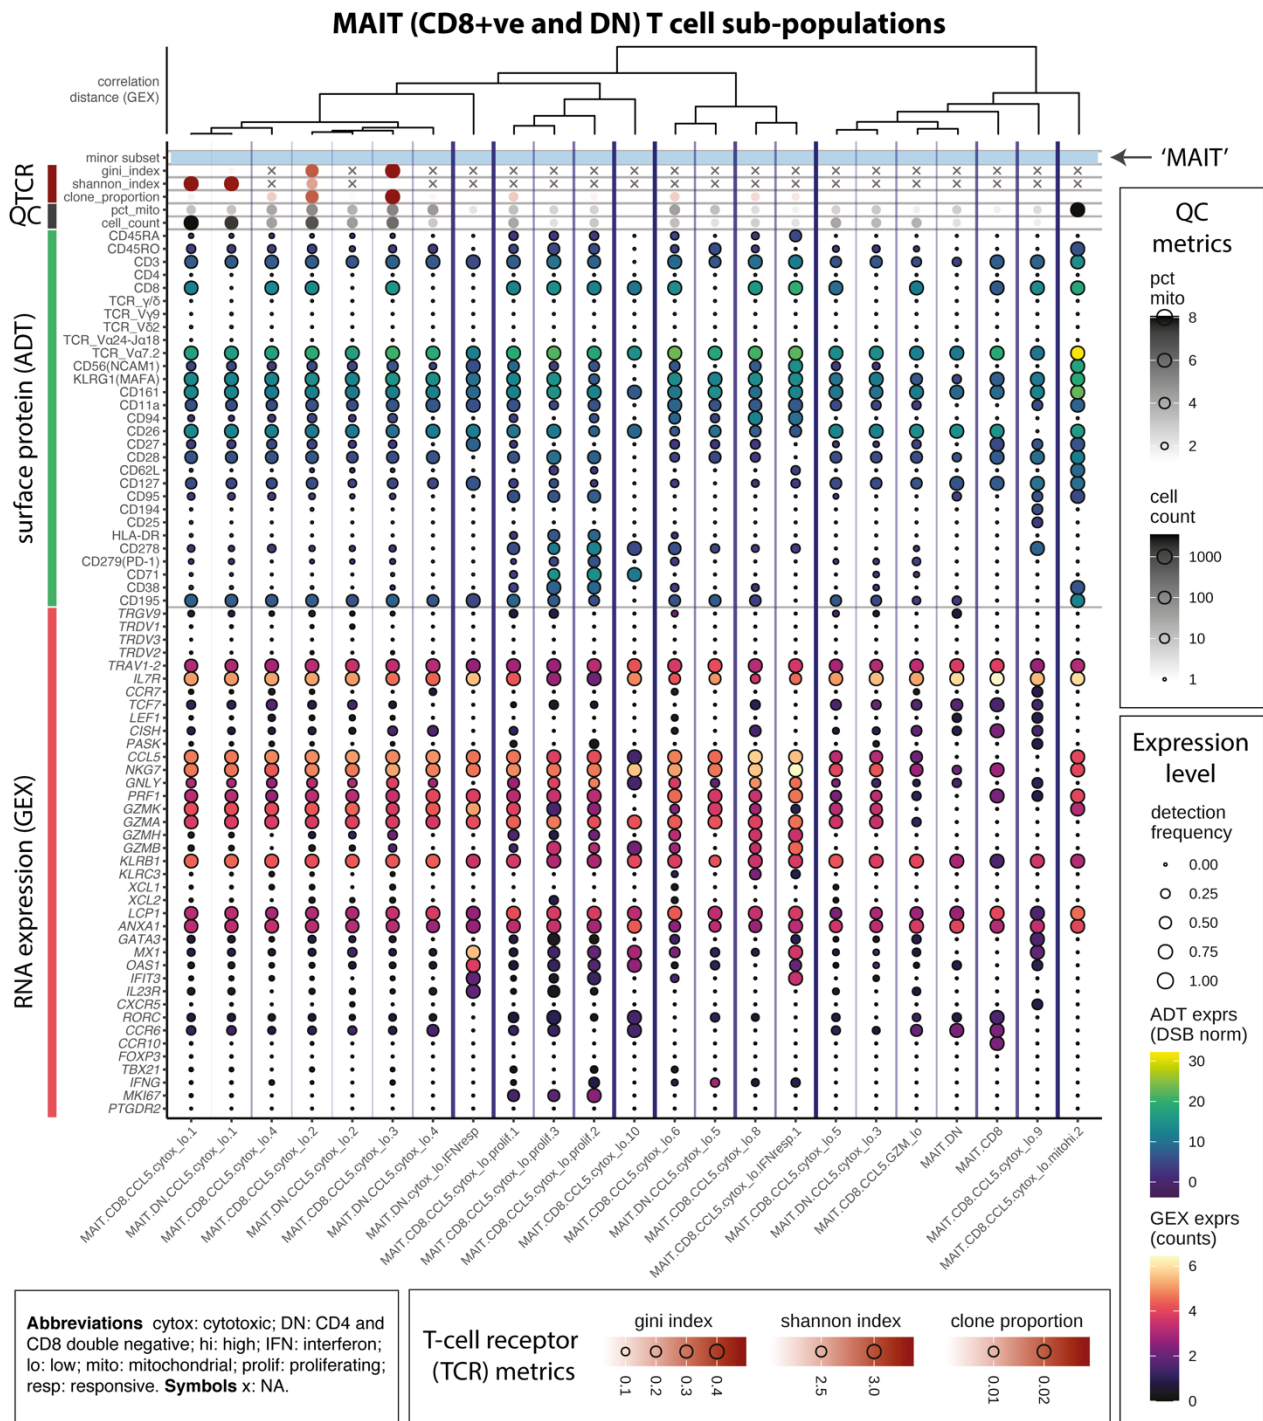

5: Dot plot of MAIT cell sub-populations.

# Gamma delta T cell sub-populations

## Gamma delta Vδ2+ve T cell sub-populations

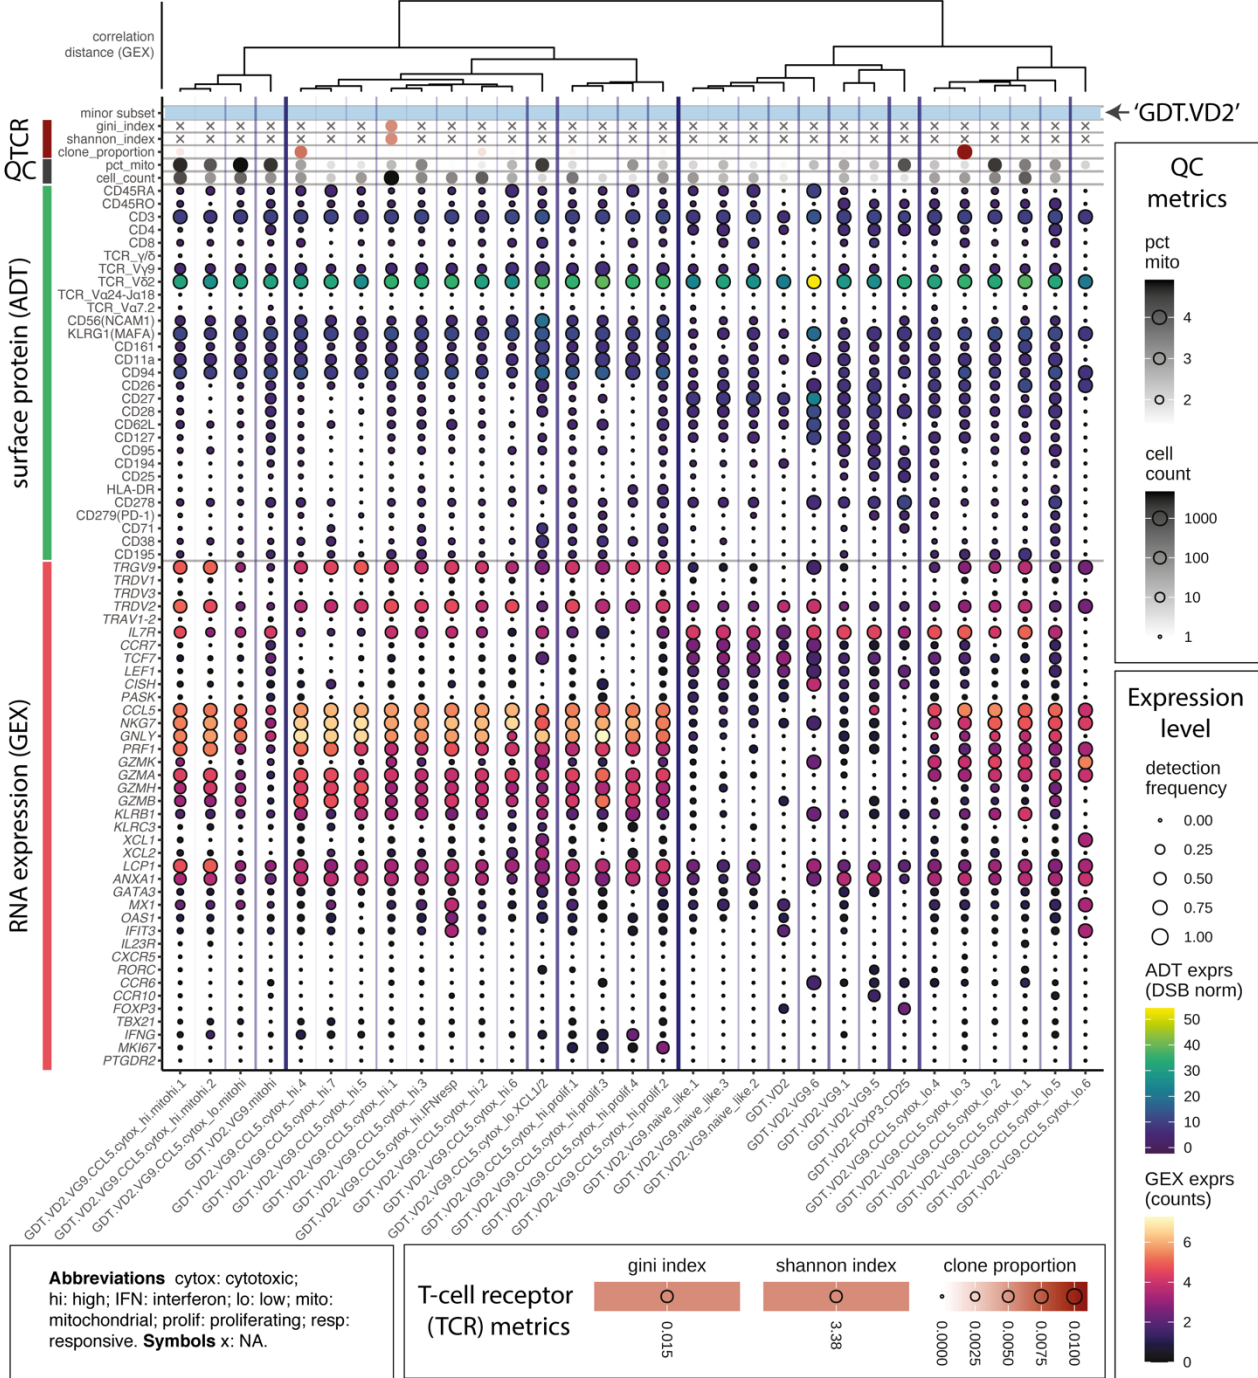

6: Dot plot of Vδ2+ve γδ T-cell sub-populations.

# Gamma delta Vδ2-ve Vy9-ve T cell sub-populations

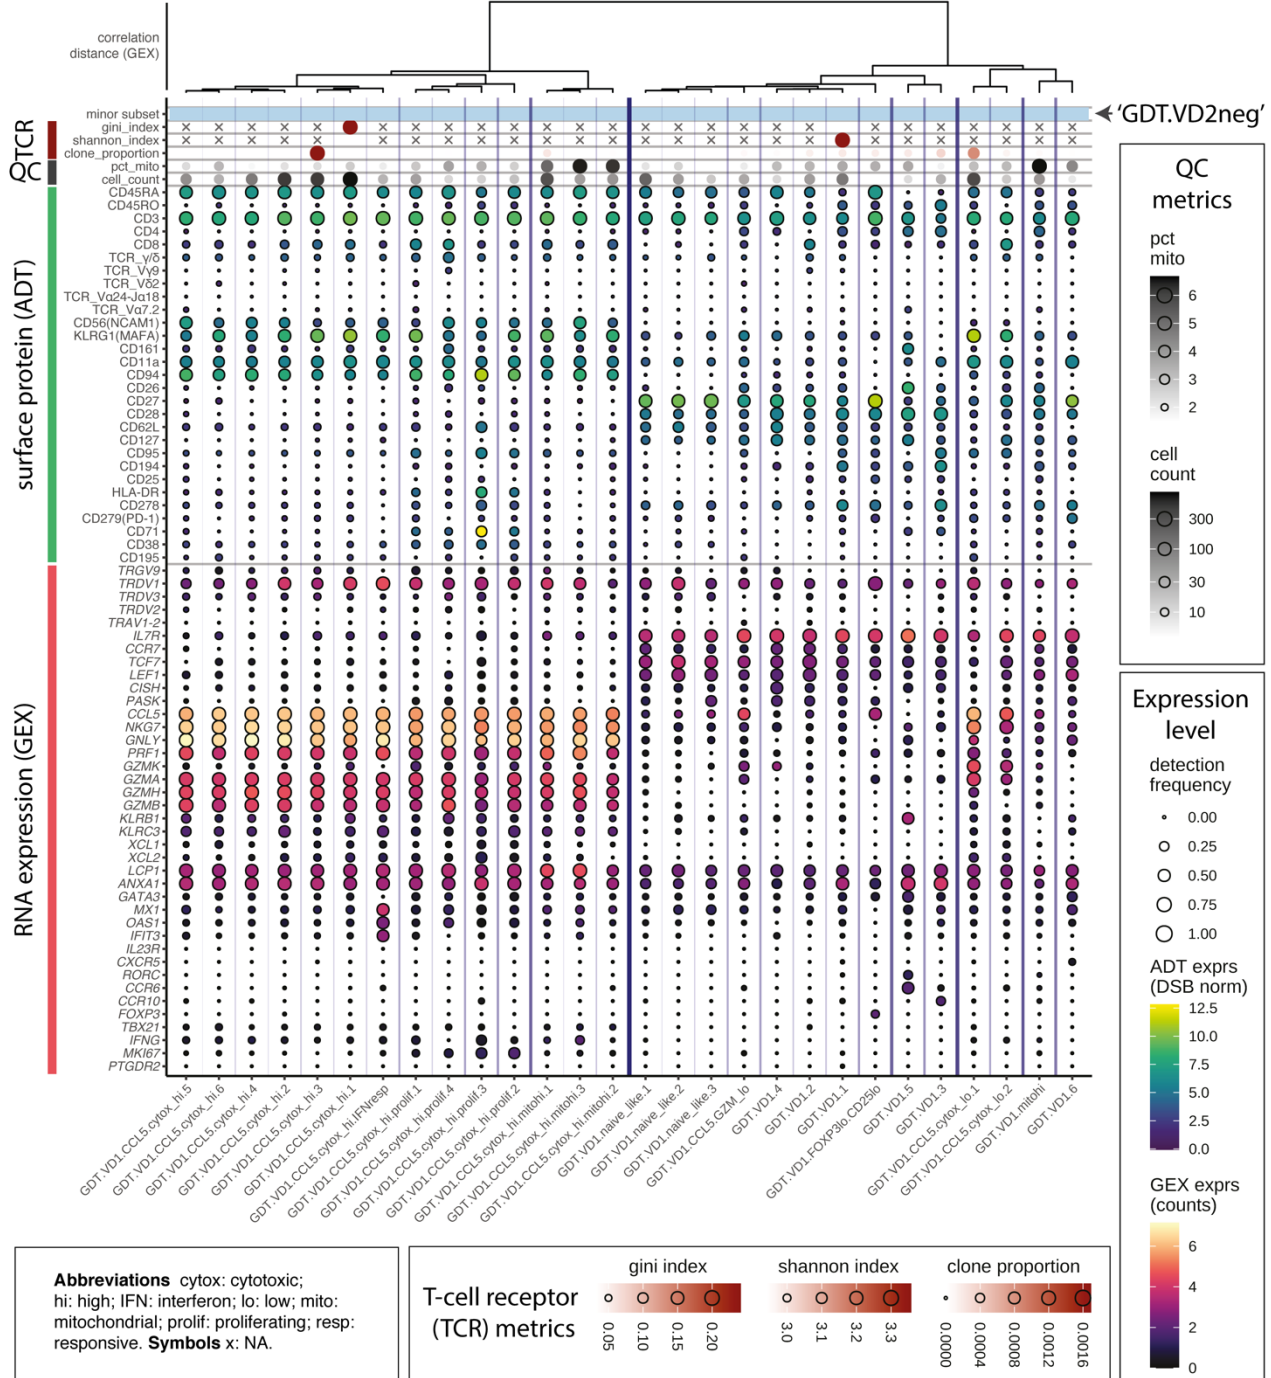

7: Dot plot of Vδ2-ve Vy9-ve γδ T-cell sub-populations.



# Gamma delta Vδ2-ve Vy9+ve T cell sub-populations

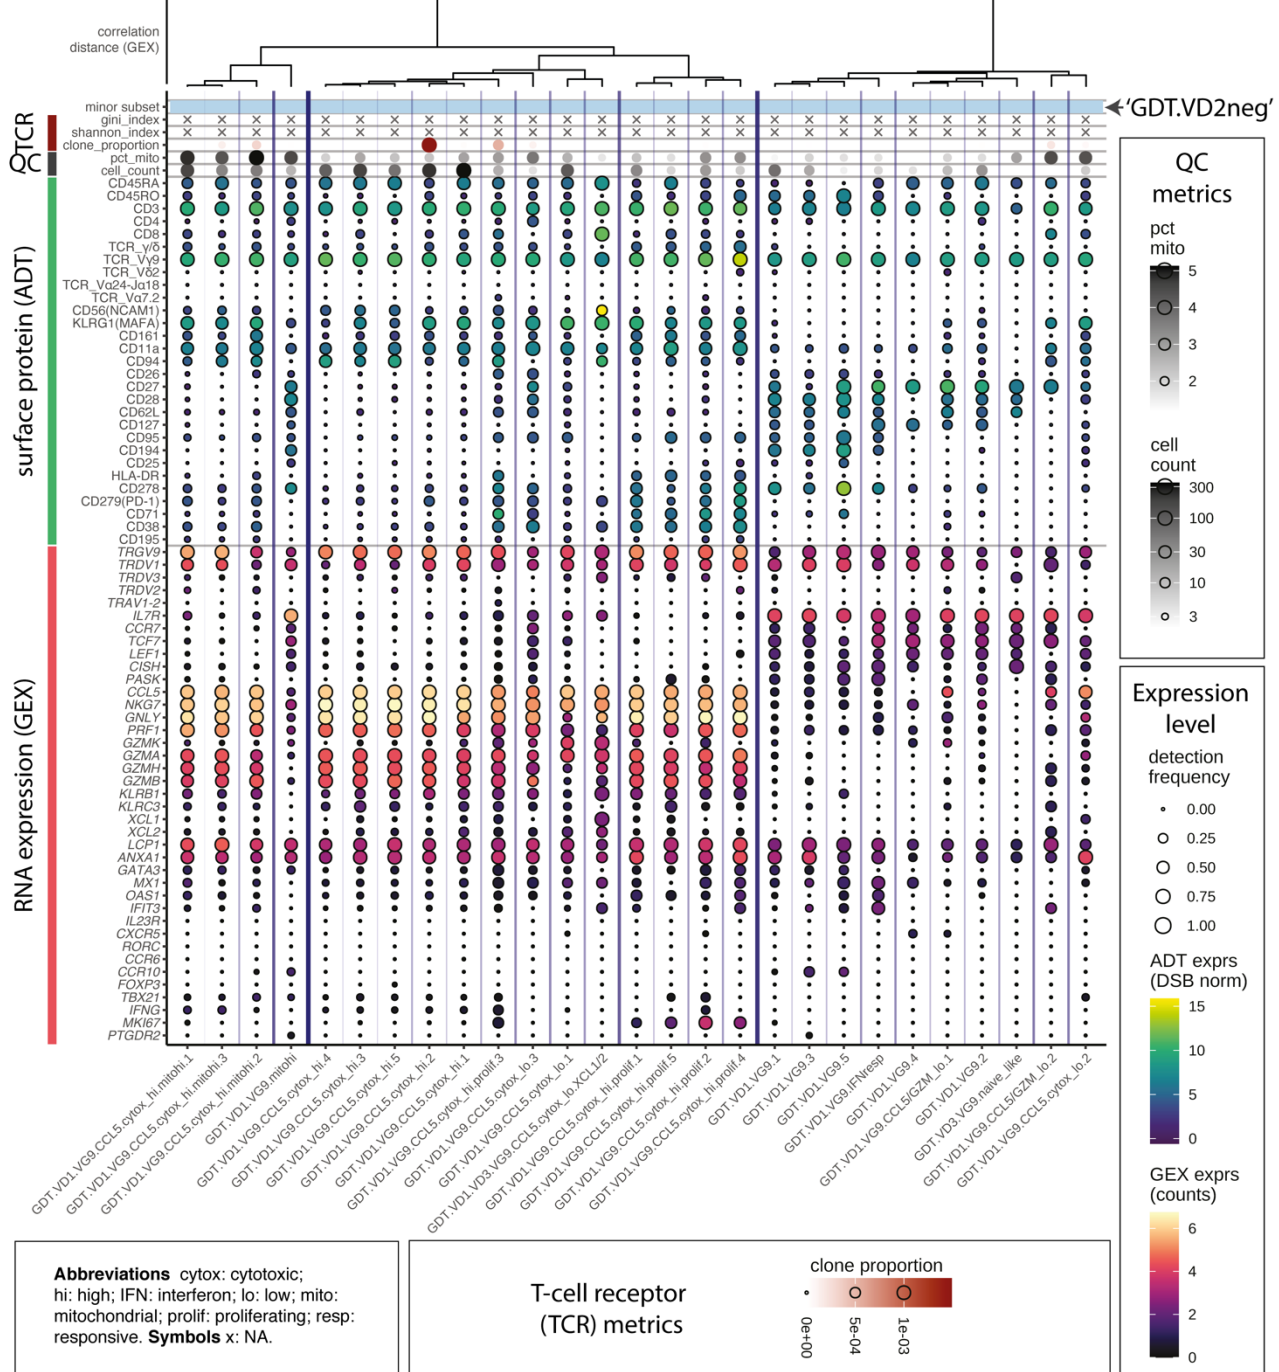

8: Dot plot of Vδ2-ve Vy9+ve γδ T-cell sub-populations.

# Invariant natural killer T (iNKT) sub-populations

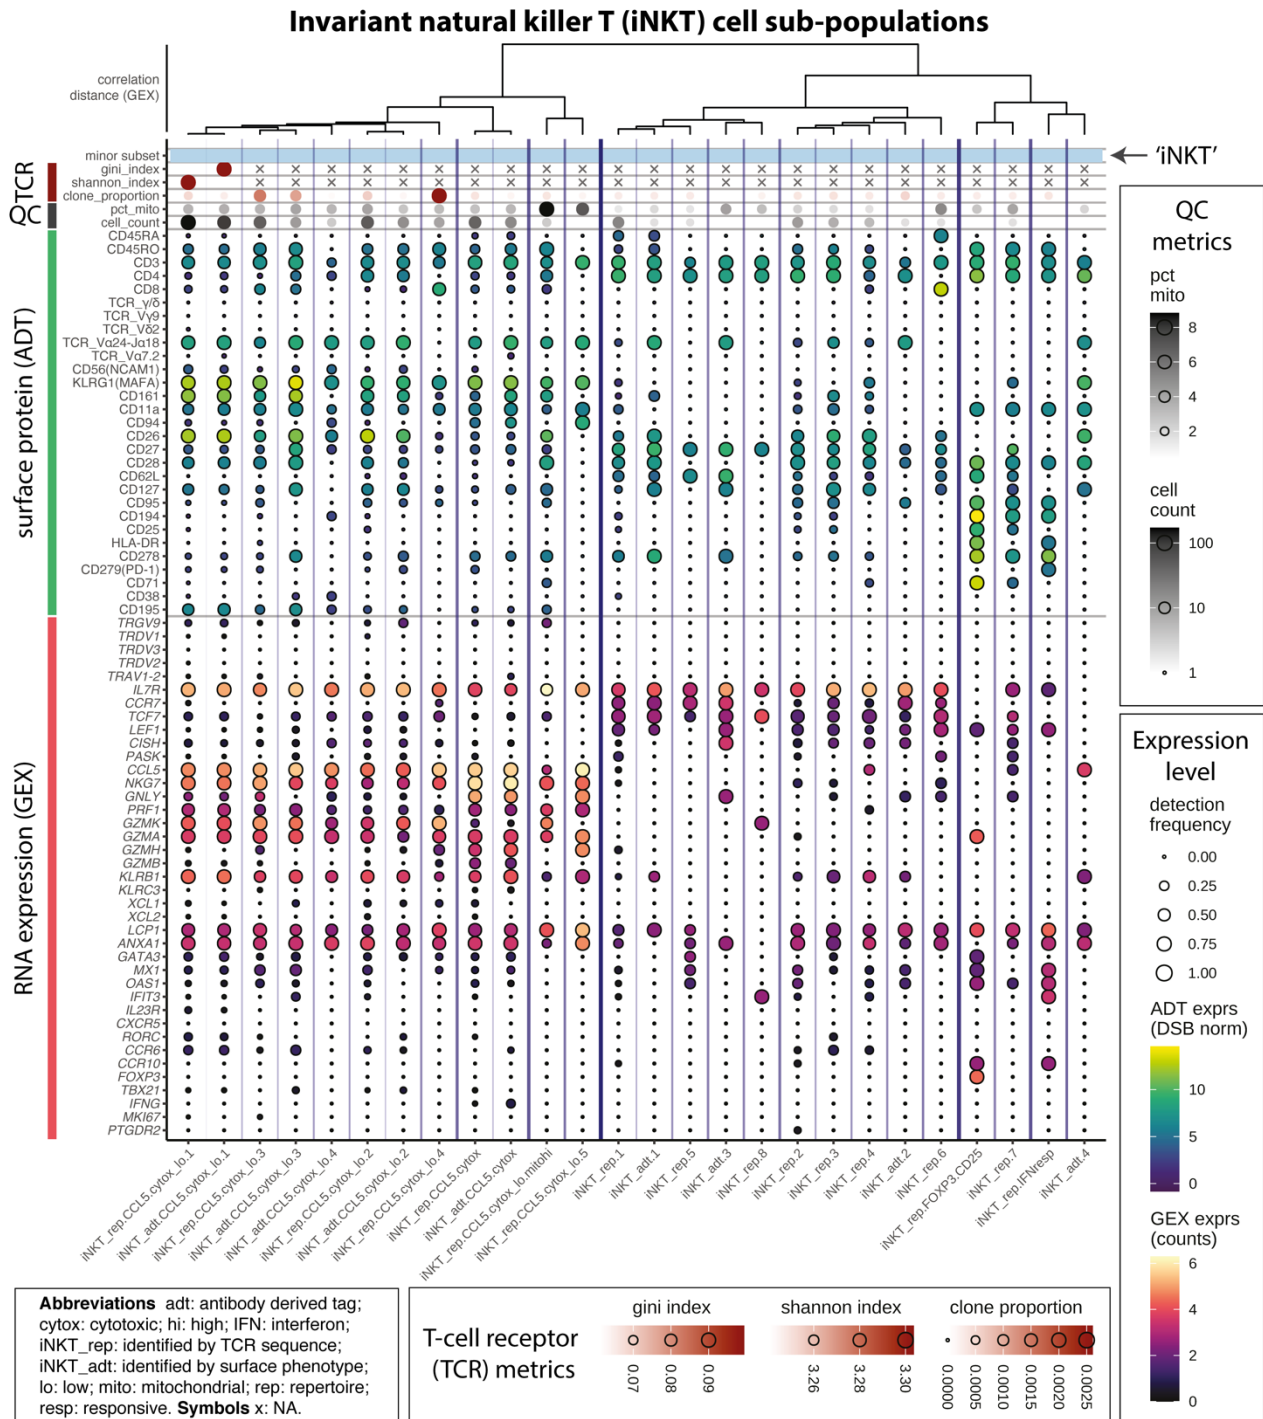

9: Dot plot of iNKT cells.

# Natural Killer (NK) cell sub-populations

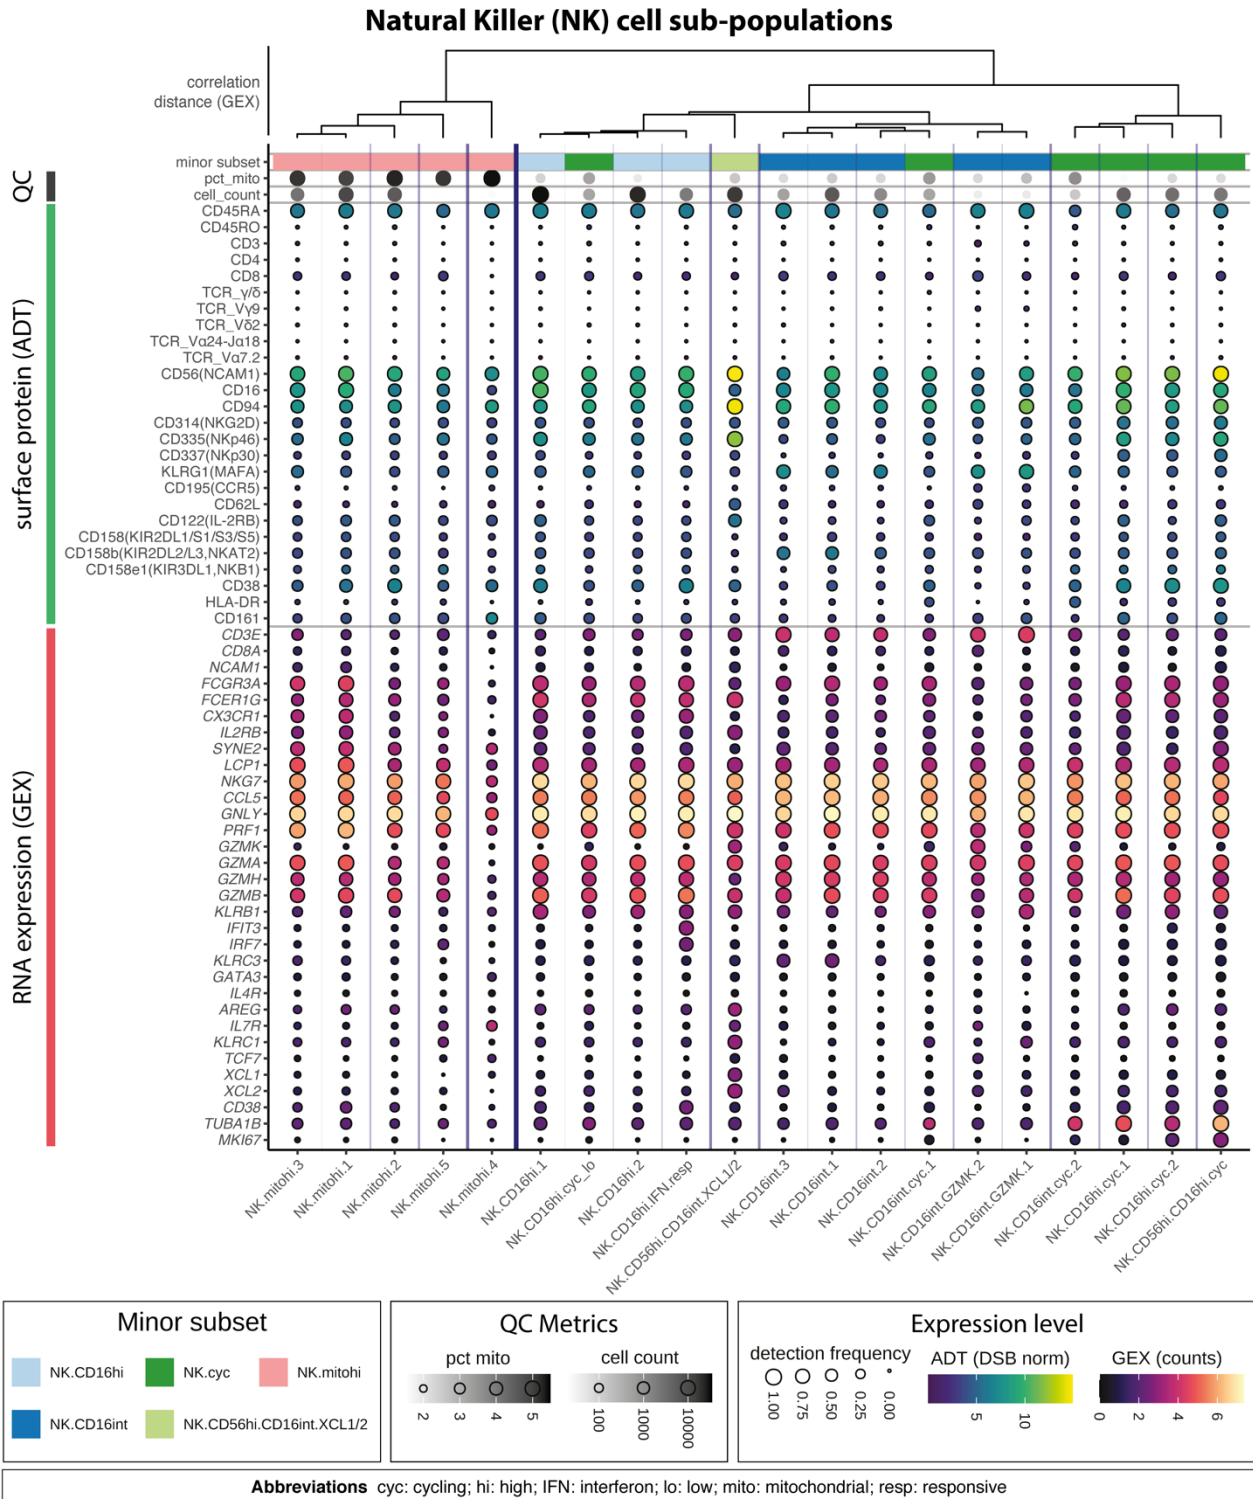

10: Dot plot of NK cell sub-populations.

# B cell and plasmablast sub-population phenotypes

The multimodal definition of the B cell and plasmablast populations are given in **Table S2: Definition of lymphoid clusters for CITE-seq data.**

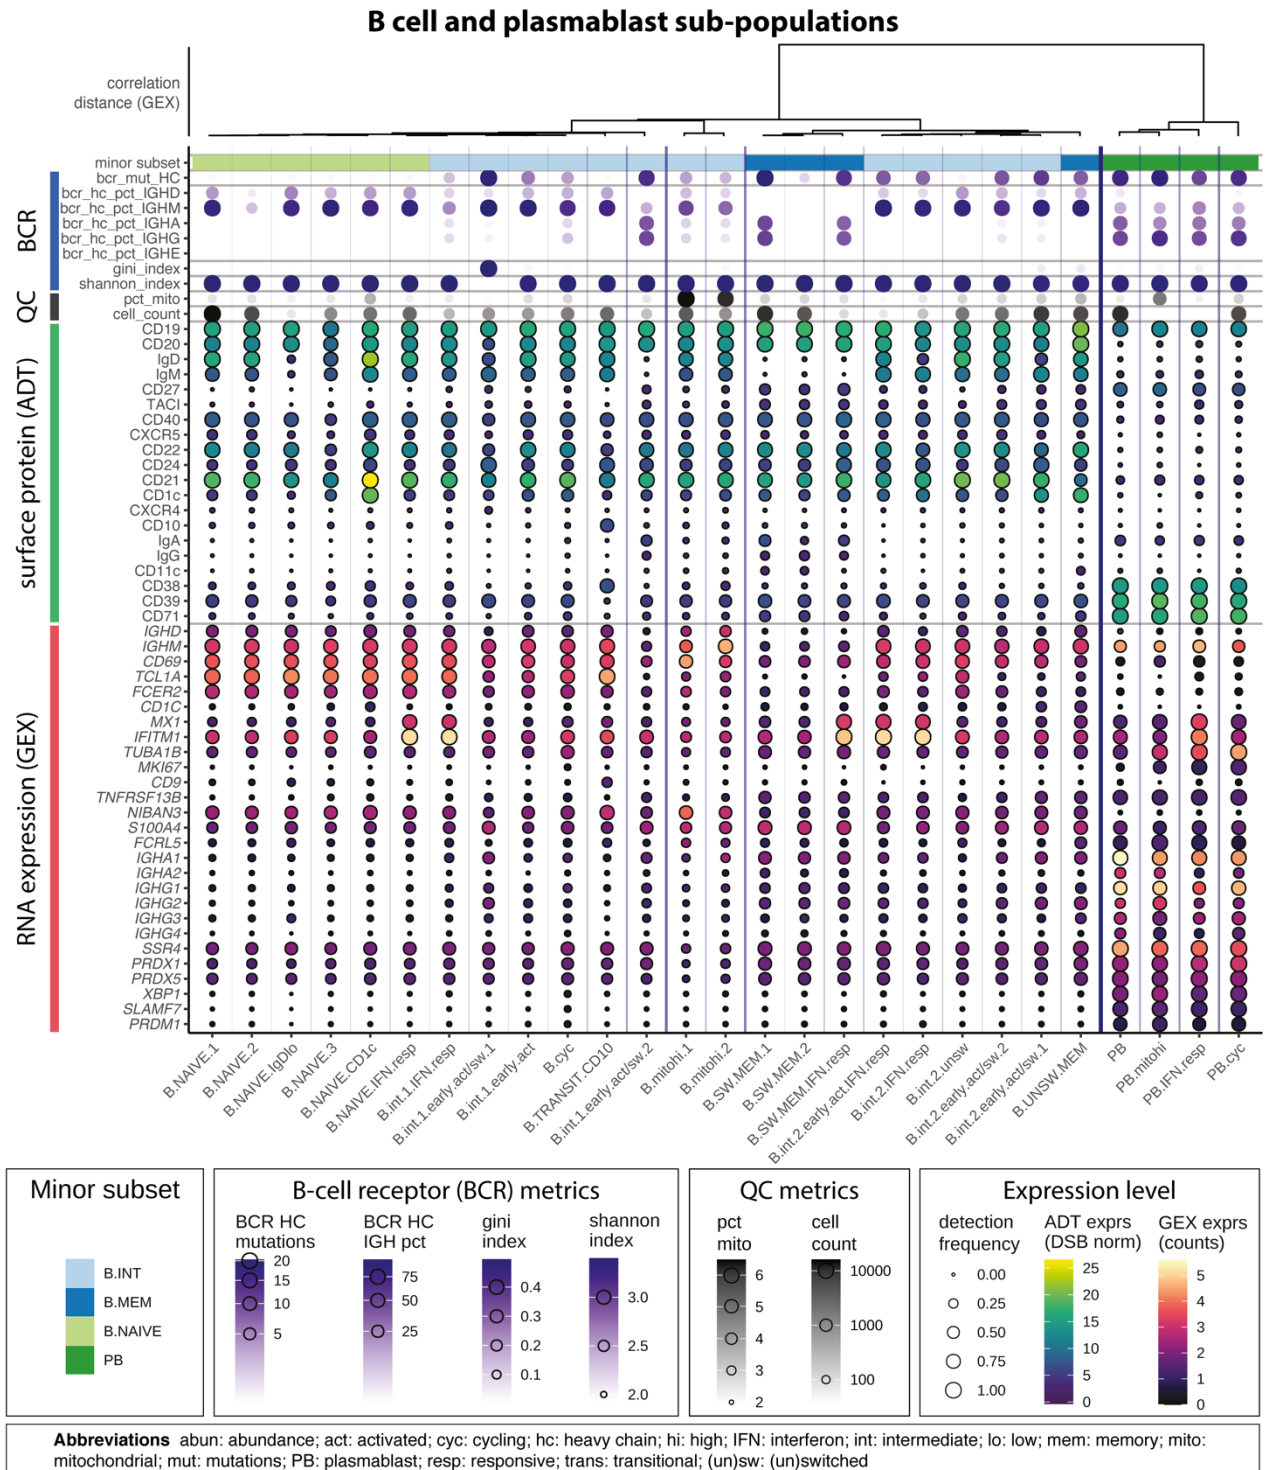

11: Dot plot of B cell and plasmablast sub-populations.



# Mononuclear phagocyte (MNP) sub-populations

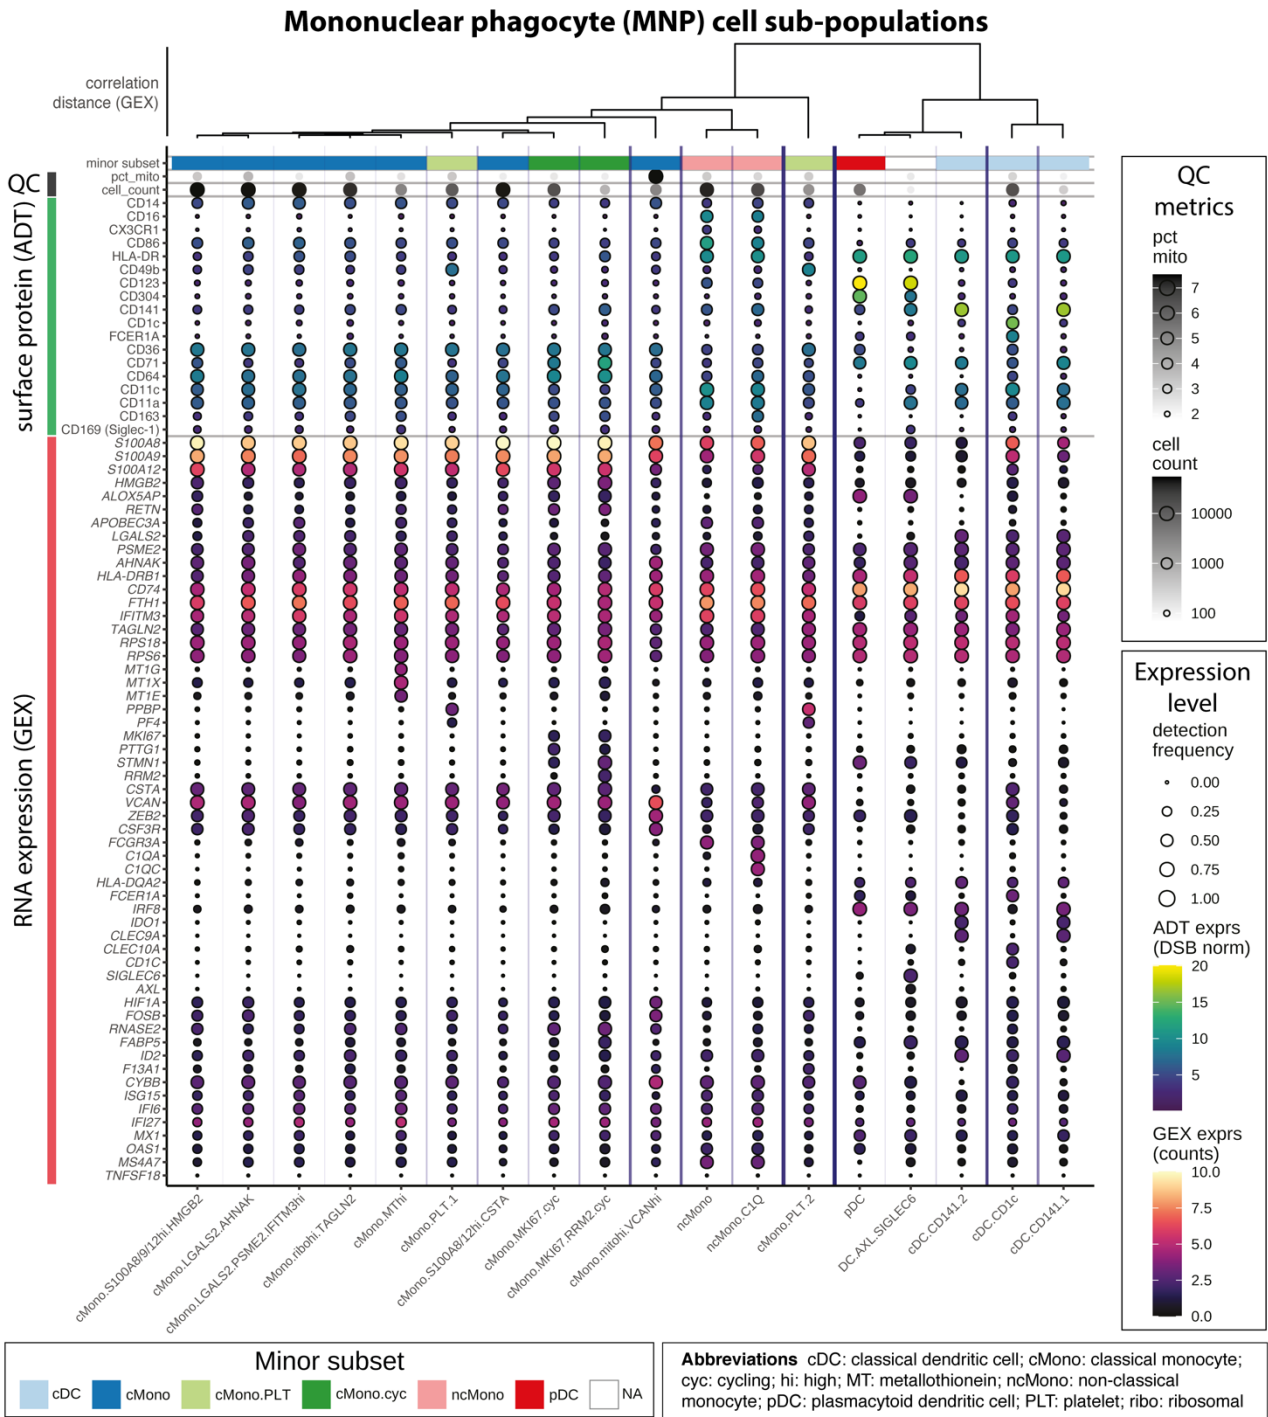

12: Dot plot of MNP cell sub-populations.

# Hematopoietic stem (and progenitor) cell sub-populations

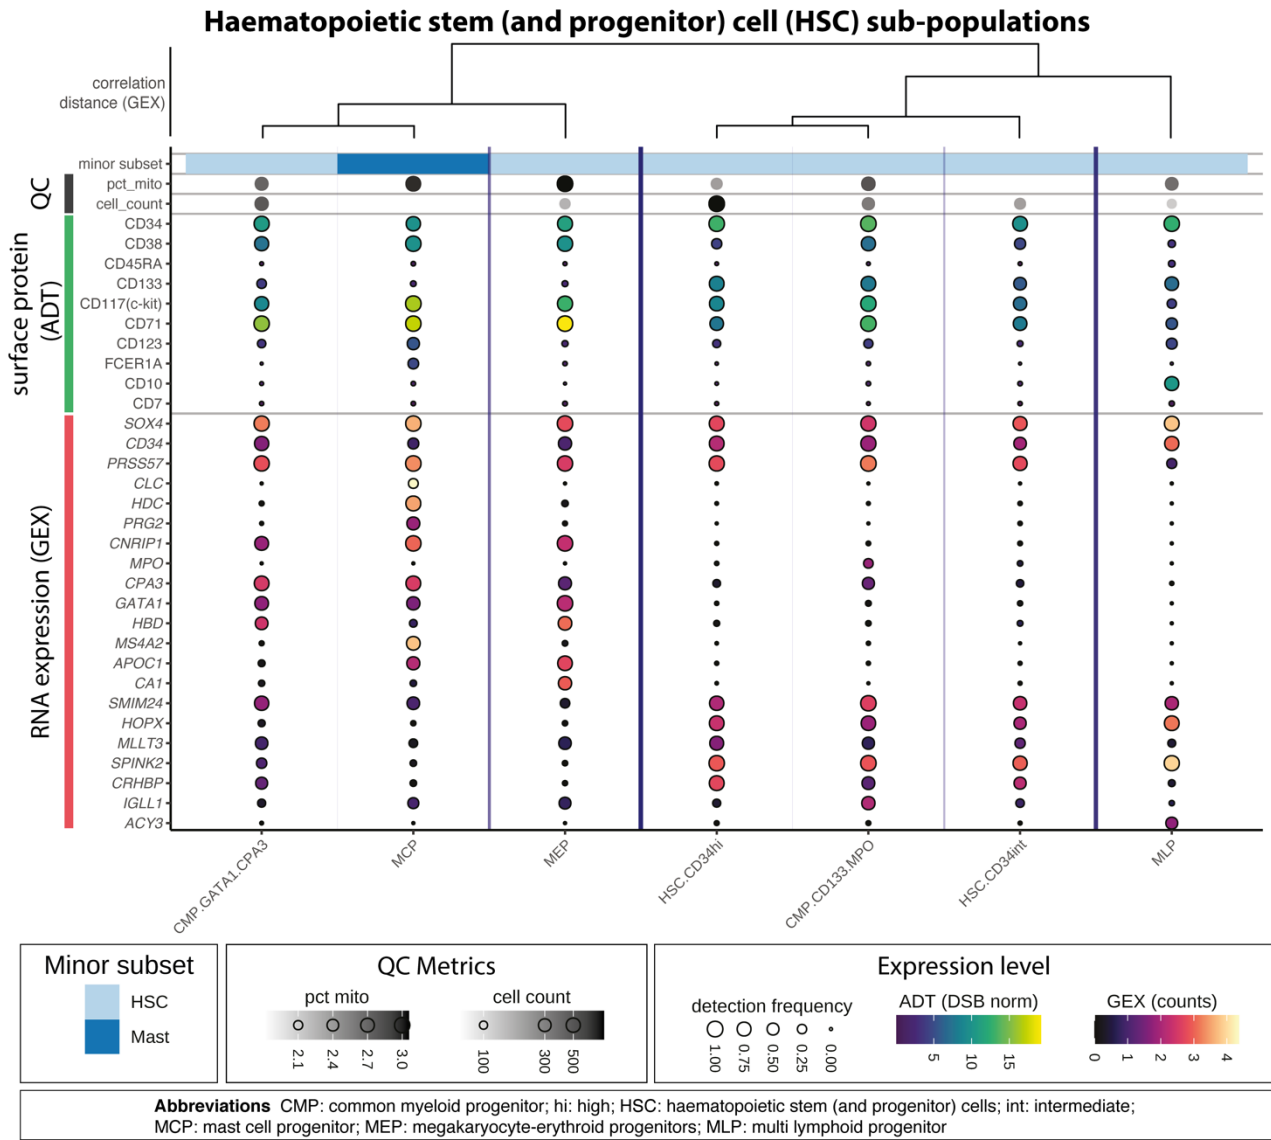

13: Dot plot of hematopoietic stem (and progenitor) cell sub-populations.

# Platelet and erythrocyte sub-populations

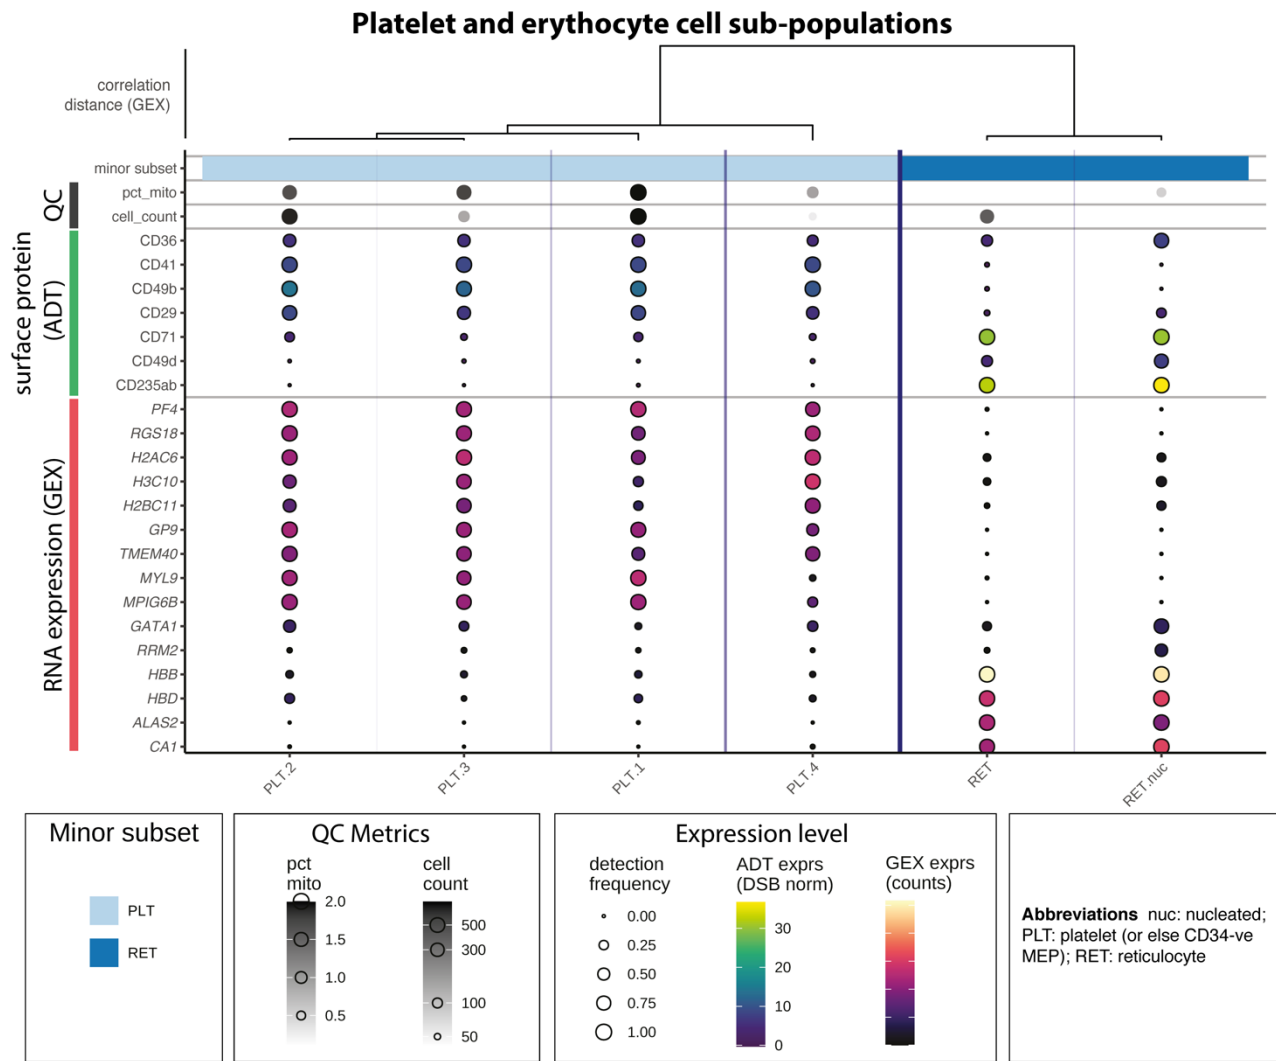

14: Dot plot of platelet and erythrocyte cell sub-populations.
